# Supplementary material for: Quantitative analysis of direct oral anticoagulant rivaroxaban by terahertz spectroscopy
Source: Royal Society of Chemistry journal article supplement (doi:10.1039/d0an00268b), 2020-01-01
Supplement: d0an00268b1.pdf [file d0an00268b1.pdf]

## Supplementary Information

### Quantitative analysis of direct oral anticoagulant rivaroxaban by terahertz spectroscopy

Wu Xu,<sup>a</sup> Wang Liping,<sup>a</sup> Peng Yan,<sup>\*a,c</sup> Wu Fang,<sup>b</sup> Cao Jiumei,<sup>\*b</sup> Chen Xiaohong,<sup>d</sup> Wu Wanwan,<sup>d</sup> Yang Huinan,<sup>e</sup> Xing Mengmeng,<sup>e</sup> Zhu Yiming,<sup>\*a,c</sup> Shi Yijue,<sup>b</sup> and Zhuang Songlin<sup>a,c</sup>

---

<sup>a</sup> Terahertz Technology Innovation Research Institute, Shanghai Key Lab of Modern Optical System, Terahertz Science Cooperative Innovation Center, University of Shanghai for Science and Technology, Shanghai, P. R. China

<sup>b</sup> Department of Geratology, Ruijin Hospital, Shanghai Jiaotong University School of Medicine, Shanghai, P. R. China

<sup>c</sup> Shanghai Institute of Intelligent Science and Technology, Tongji University, Shanghai, P. R. China

<sup>d</sup> School of Material Science and Engineering, University of Shanghai for Science and Technology, Shanghai, P. R. China

<sup>e</sup> School of Energy and Power Engineering, University of Shanghai for Science and Technology, Shanghai, P. R. China

\*corresponding author

Email address: py@usst.edu.cn; cjm11261@rjh.com.cn; ymzhu@usst.edu.cn

## Acronyms list

TD: thrombosis disease

LC-MS/MS: liquid chromatography-tandem mass spectrometry

THz: terahertz

DFT: density functional theory

HDPE: high-density polyethylene powder

DMSO: dimethyl sulfoxide

FTIR: Fourier transform infrared spectrophotometer

*w*: wagging

*r*: rocking

*tw*: twisting

*Ph*: benzene ring (phenyl group)

LoD: lowest detection limit

PT: prothrombin time

INR: international normalized ratio

2.17 THz

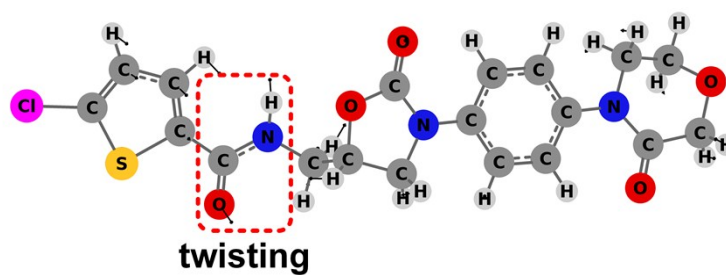

Fig. S1. Molecular motion of rivaroxaban, corresponding to the experimental THz peak at 2.17 THz
